# Supplementary material
Source: publisher figshare collection journal article supplement (https://acs.figshare.com/ndownloader/files/4856203)
Supplement: Supplementary file 1 [file 4856203]

## Supporting Information

### Single Hydrogen Bond Donation from Flavin N<sub>5</sub> to Proximal Asparagine Ensures FAD Reduction in DNA Photolyase

*I M. Mahaputra Wijaya,<sup>§</sup> Tatiana Domratcheva,<sup>±,\*</sup> Tatsuya Iwata,<sup>§,†</sup> Elizabeth D. Getzoff,<sup>δ</sup> and Hideki Kandori<sup>§,†,\*</sup>*

<sup>§</sup>Department of Frontier Materials, and <sup>†</sup>OptoBio-Technology Research Center, Nagoya Institute of Technology, Japan.

<sup>±</sup> Department of Biomolecular Mechanisms, Max Planck Institute for Medical Research, Jahnstrasse 29, Heidelberg 69120 Germany

<sup>δ</sup>Department of Integrative Structural and Computational Biology and The Skaggs Institute for Chemical Biology, The Scripps Research Institute, USA

#### Contents:

- Expression methods of CPD photolyase enzymes.
- Purification of CPD photolyase enzymes.
- Figure S1. Light-induced difference UV-visible spectra of FADH<sup>•</sup> into FADH<sup>-</sup> of unlabeled enzyme.
- Figure S2. Light-induced difference UV-visible spectra from FAD<sup>ox</sup> into FADH<sup>-</sup> of unlabeled enzyme.
- Figure S3. Double difference spectra of Asn reverse-labeled (blue) *minus* Uniformly <sup>13</sup>C-labeled (red) of Figure 1b.
- Figure S4. The computational model of the *E. coli* photolyase active site.
- Figure S5. Structure of the lumiflavin-water complex LfH-6H<sub>2</sub>O in the semiquinone (neutral) and hydroquinone (anionic) states.

- Figure S6. Geometry of the FAD<sup>ox</sup> form with rotated Asn378 in comparison to the geometries of other models presented in Figure 4.
- Figure S7. Computed infrared difference spectrum FADH<sup>-</sup> *minus* FAD<sup>ox</sup> with rotated Asn378. Unlabeled (black), Uniformly <sup>13</sup>C-labeled (red) and Asn reverse-labeled (blue) spectra.
- Table S1. Assignments of the computed infrared spectra in the region of the double bond stretches.

**Expression of Enzymes.** The unlabeled, uniform  $^{13}\text{C}$ -labeled, and Asn reverse-labeled *E. coli* CPD photolyase enzyme was made from the E109A mutant which does not carry MTHF, used as WT enzyme, and prepared as N-terminal His<sub>6</sub>-tagged protein using an expression system in *E. coli* strain BL21(DE3) as previously reported with slight modifications.<sup>16,31</sup> For the uniform  $^{13}\text{C}$  labeled enzyme, *E. coli* with the CPD photolyase gene was grown in M9 minimum medium with  $^{13}\text{C}$  glucose (Cambridge Isotope Laboratories; 99.0% purity). The  $^{12}\text{C}$  asparagine in  $^{13}\text{C}$  enzyme, termed Asn reverse-labeled enzyme, was prepared as follows. The  $^{12}\text{C}$  (unlabeled) Asn (100 mg/L) was added 30 min prior to the addition of IPTG into *E. coli* CPD photolyase grown in  $^{13}\text{C}$  M9 minimum medium. Cells were grown at 24 °C until the OD<sub>660</sub> reached 0.4, IPTG was added to a final concentration of 1 mM, and the culture was incubated at 18 °C for 18 h, then harvested by centrifugation at 8,000 rpm for 5 min.

**Purification of Enzymes.** The harvested cells were resuspended in lysis buffer [50 mM NaH<sub>2</sub>PO<sub>4</sub>, 300 mM NaCl, 20 mM imidazole, and 5% (v/v) glycerol (pH 8.0)]. Using a French press to break the cells, the insoluble fraction was removed by centrifugation (17,000 g) for 60 min. The supernatant was loaded onto a Co-NTA column (TALON Metal Affinity Resin, Clontech) which was then washed in a 20-bed volume wash buffer [50 mM NaH<sub>2</sub>PO<sub>4</sub>, 300 mM NaCl, and 20 mM imidazole (pH 8.0)]. The fusion protein was eluted with elution buffer [50 mM NaH<sub>2</sub>PO<sub>4</sub>, 300 mM NaCl, and 250 mM imidazole (pH 8.0)]. For the enzyme resting in a semiquinoid form in an unphotolyzed state, the purified protein in elution buffer was then exchanged into storage buffer with an electron donor [50 mM HEPES, 100 mM NaCl, 25 mM β-mercaptoethanol, and 20% (v/v) glycerol (pH 7.0)] by dilution and ultrafiltration (Amicon Ultra 30K device, Millipore) prior to being stored at -80 °C prior to use. Meanwhile, for oxidized enzyme in an unphotolyzed state, to induce

oxidation, the purified enzyme was exchanged with storage buffer without an electron donor [50 mM HEPES, 100 mM NaCl, and 20% (v/v) glycerol (pH 7.0)] stored at 4 °C and aerated for several days until the green enzyme visibly turned yellow. The presence of  $^{12}\text{C}$  Asparagine in  $^{13}\text{C}$  enzyme does not change or alter the stability of the enzyme, since both enzyme has the same stability in room temperature upon sample preparation for spectroscopic measurement. From 1 L of *E. coli* culture, approximately 6 mg of E109A (WT) and 3 mg of uniform  $^{13}\text{C}$ -labeled and Asn reverse-labeled enzyme were obtained from each liter of LB and M9 media, respectively. Isotope-labeling is believed to have yielded >90% of enzyme (see Results section).

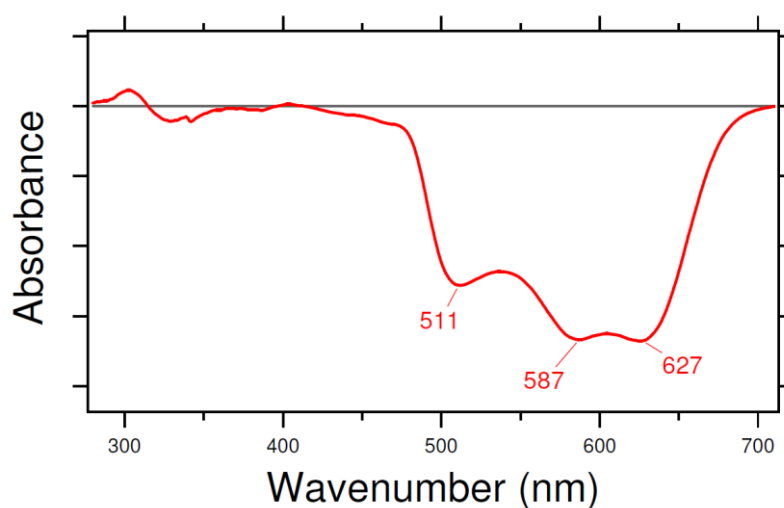

**Figure S1.** Light-induced difference UV-visible spectra of FADH• into FADH<sup>-</sup> of unlabeled enzyme by illumination of >550 nm light for 2 min; one division is 10<sup>-2</sup> absorbance units. Peak close to 300 nm is due to sample absorbance exceeded detector limitation.

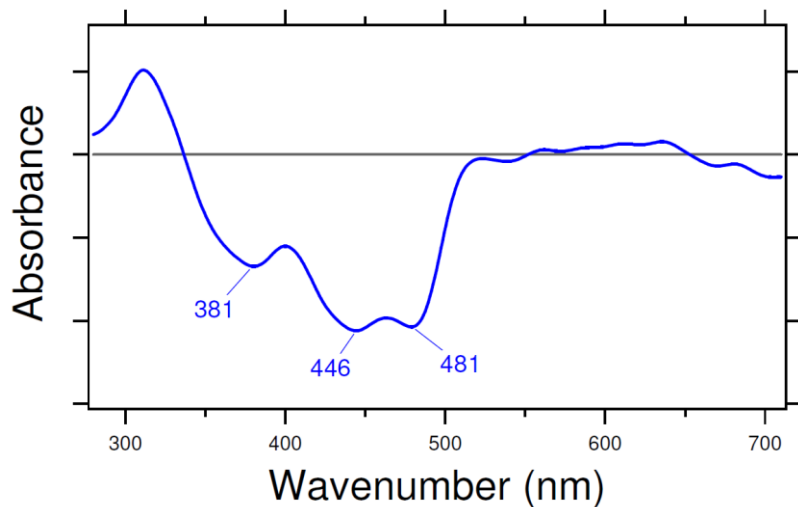

**Figure S2.** Light-induced difference UV-visible spectra from  $\text{FAD}^{\text{ox}}$  into  $\text{FADH}^-$  of unlabeled enzyme by illumination of  $>390$  nm light for 2 min followed by  $>550$  nm for 30 s; one division is  $10^{-3}$  absorbance units. Peak close to 300 nm is due to sample absorbance exceeded detector limitation.

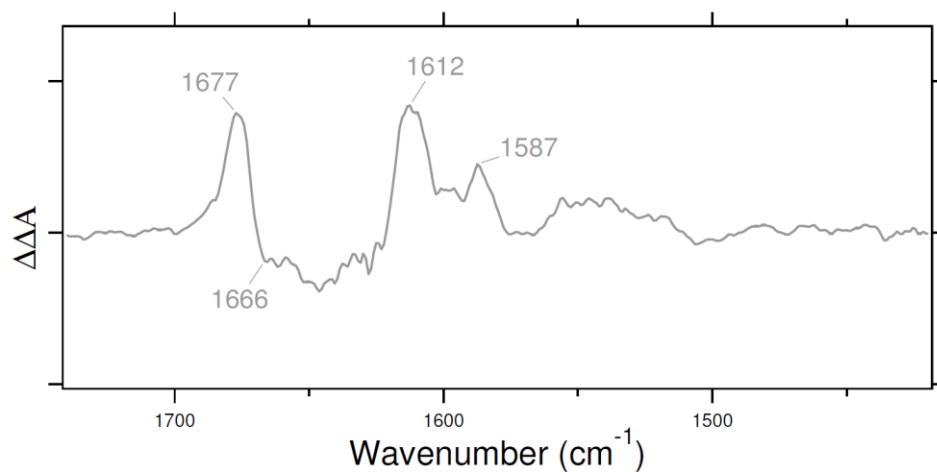

**Figure S3.** Double difference spectra of Asn reverse-labeled (blue) *minus* Uniformly  $^{13}\text{C}$ -labeled (red) in Figure 1b, where one division equals 0.003 absorbance unit.

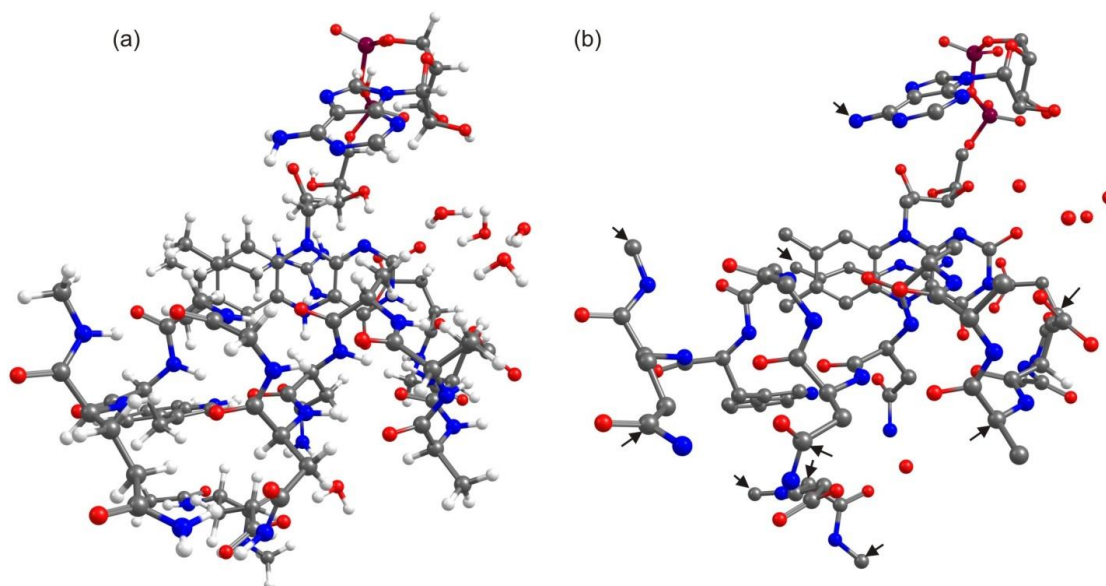

**Figure S4.** The computational model of the *E. coli* photolyase active site. (a) All atoms of the model in the FADH<sup>-</sup> state and (b) the heavy atoms of the model shown in the panel (a). The black arrows point to the atoms with the Cartesian coordinates fixed to the respective PDB values during geometry optimization.

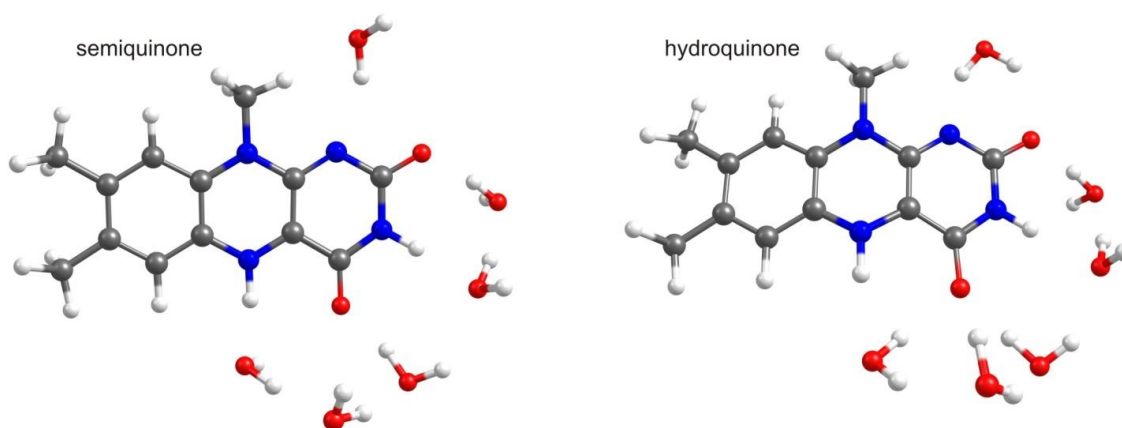

**Figure S5.** Structure of the lumiflavin-water complex LfH-6H<sub>2</sub>O in the neutral semiquinone and anionic hydroquinone states. Geometry optimization was carried out with the (U)B3LYP/6-31G\* method.

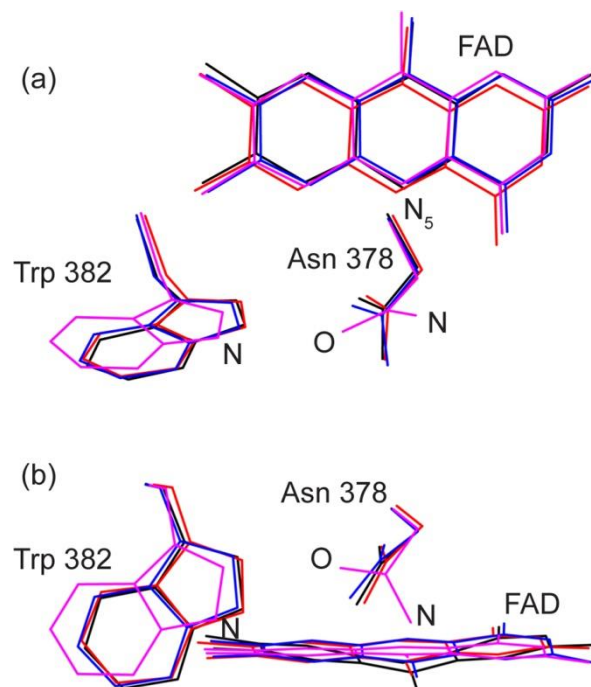

**Figure S6.** Geometry of the model in the  $\text{FAD}^{\text{ox}}$  state with rotated Asn378 (magenta) in comparison to the geometries of the models presented in Figure 4. The N and O atoms are indicated for rotated Asn378.

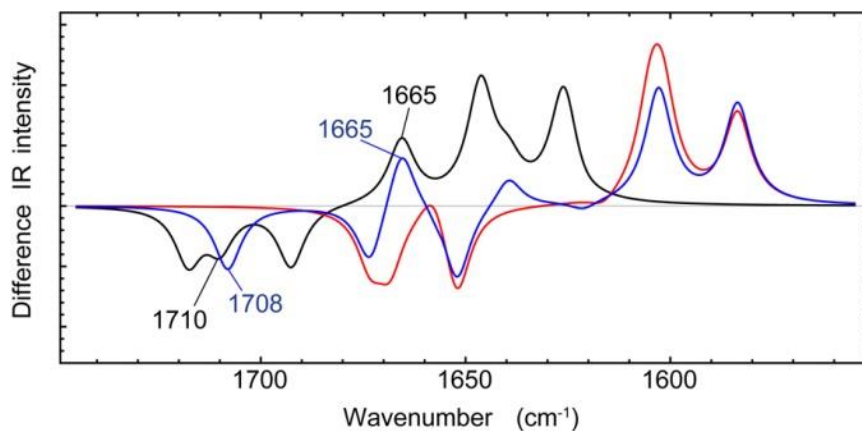

**Figure S7.** Computed infrared difference spectra  $\text{FADH}^- \text{ minus } \text{FAD}^{\text{ox}}$ . The model with  $\text{FAD}^{\text{ox}}$  contains rotated Asn378. Unlabeled (black), uniformly  $^{13}\text{C}$ -labeled (red) and Asn reverse-labeled (blue) spectra. The numbers indicate the assignment of the Asn378 frequencies. Assignments of

other frequencies in the region of the double bond stretches are presented in Table S1. IR intensity is in Debye/AMU·Å<sup>2</sup>.

**Table S1.** Assignments of the computed infrared spectra in the region of the double bond stretches.

| <sup>12</sup> C                          |                       |                       | <sup>13</sup> C |         |                     | Fl- <sup>13</sup> C, Asn- <sup>12</sup> C |         |                     |
|------------------------------------------|-----------------------|-----------------------|-----------------|---------|---------------------|-------------------------------------------|---------|---------------------|
| Frq. <sup>a)</sup>                       | IR Int. <sup>b)</sup> | Assign. <sup>c)</sup> | Frq.            | IR Int. | Assign.             | Frq.                                      | IR Int. | Assign.             |
| FAD <sup>ox</sup>                        |                       |                       |                 |         |                     |                                           |         |                     |
| 1730                                     | 9.79                  | Fl C=O <sub>2</sub>   | 1686            | 10.21   | Fl C=O <sub>2</sub> | 1686                                      | 9.98    | Fl C=O <sub>2</sub> |
| 1702                                     | 11.95                 | Fl C=O <sub>4</sub>   | 1665            | 3.8     | Asn                 | 1677                                      | 11.6    | Asn                 |
| 1677                                     | 10.23                 | Asn                   | 1661            | 13.33   | Fl C=O <sub>4</sub> | 1662                                      | 9.52    | Fl C=O <sub>4</sub> |
| 1645                                     | 3.27                  | Asn                   | 1613            | 6.29    | Asn                 | 1645                                      | 3.13    | Asn                 |
| 1613                                     | 1.03                  | Fl                    | 1559            | 2.13    | Fl                  | 1559                                      | 2.11    | Fl                  |
| 1568                                     | 15.56                 | Fl                    | 1523            | 15.28   | Fl                  | 1522                                      | 15.38   | Fl                  |
| 1530                                     | 16.68                 | Fl                    | 1496            | 2.63    | Fl                  | 1495                                      | 2.64    | Fl                  |
| 1516                                     | 3.24                  | Fl                    | 1489            | 0.43    | Fl                  | 1490                                      | 0.42    | Fl                  |
| 1488                                     | 0.65                  | Fl                    | 1469            | 2.7     | Fl                  | 1469                                      | 2.71    | Fl                  |
| FAD <sup>ox</sup> -(Asn <sup>rot</sup> ) |                       |                       |                 |         |                     |                                           |         |                     |
| 1718                                     | 9.1                   | Fl C=O <sub>2</sub>   | 1673            | 8.31    | Fl C=O <sub>2</sub> | 1709                                      | 10.42   | Asn                 |
| 1710                                     | 6.46                  | Asn                   | 1668            | 9.22    | Asn                 | 1673                                      | 10.28   | Fl C=O <sub>2</sub> |
| 1693                                     | 19.07                 | Fl C=O <sub>4</sub>   | 1652            | 14.95   | Fl C=O <sub>4</sub> | 1652                                      | 12.81   | Fl C=O <sub>4</sub> |
| 1621                                     | 1.4                   | Asn                   | 1616            | 1.83    | Asn                 | 1621                                      | 1.44    | Asn                 |
| 1614                                     | 0.18                  | Fl                    | 1559            | 0.51    | Fl                  | 1559                                      | 0.53    | Fl                  |
| 1565                                     | 11.21                 | Fl                    | 1520            | 11.93   | Fl                  | 1520                                      | 11.98   | Fl                  |
| 1527                                     | 14.31                 | Fl                    | 1494            | 5.05    | Fl                  | 1494                                      | 5.04    | Fl                  |
| 1508                                     | 0.09                  | Fl                    | 1481            | 1.78    | Fl                  | 1481                                      | 1.78    | Fl                  |
| 1491                                     | 0.41                  | Fl                    | 1468            | 0.33    | Fl                  | 1572                                      | 0.56    | Fl                  |
| FADH <sup>•</sup>                        |                       |                       |                 |         |                     |                                           |         |                     |
| 1688                                     | 16.79                 | Fl C=O <sub>2</sub>   | 1657            | 5.27    | Asn                 | 1663                                      | 9.28    | Asn                 |
| 1664                                     | 4.07                  | Asn                   | 1644            | 19.0    | Fl C=O <sub>2</sub> | 1644                                      | 18.98   | Fl C=O <sub>2</sub> |
| 1659                                     | 20.78                 | Fl C=O <sub>4</sub>   | 1617            | 12.08   | Fl C=O <sub>4</sub> | 1626                                      | 12.23   | Fl C=O <sub>4</sub> |
| 1626                                     | 6.05                  | Asn                   | 1587            | 8.20    | Asn                 | 1616                                      | 5.82    | Asn                 |
| 1603                                     | 0.17                  | Fl                    | 1556            | 1.79    | Fl                  | 1557                                      | 1.43    | Fl                  |
| 1591                                     | 2.81                  | Fl                    | 1546            | 0.94    | Fl                  | 1547                                      | 0.68    | Fl                  |
| 1530                                     | 16.26                 | Fl                    | 1494            | 12.18   | Fl                  | 1494                                      | 12.64   | Fl                  |
| 1516                                     | 2.37                  | Fl                    | 1491            | 1.65    | Fl                  | 1492                                      | 1.16    | Fl                  |
| 1502                                     | 0.78                  | Fl                    | 1472            | 3.2     | Fl                  | 1472                                      | 3.19    | Fl                  |
| FADH <sup>-</sup>                        |                       |                       |                 |         |                     |                                           |         |                     |
| 1666                                     | 10.48                 | Asn                   | 1658            | 6.02    | Asn                 | 1666                                      | 10.94   | Asn                 |
| 1646                                     | 19.30                 | Fl C=O <sub>2</sub>   | 1603            | 14.66   | Asn                 | 1640                                      | 5.06    | Asn                 |
| 1640                                     | 5.02                  | Asn                   | 1602            | 15.29   | Fl C=O <sub>2</sub> | 1603                                      | 19.01   | Fl C=O <sub>2</sub> |
| 1626                                     | 19.13                 | Fl C=O <sub>4</sub>   | 1584            | 14.61   | Fl C=O <sub>4</sub> | 1584                                      | 16.4    | Fl C=O <sub>4</sub> |
| 1599                                     | 0.28                  | Fl                    | 1544            | 0.38    | Fl                  | 1544                                      | 0.35    | Fl                  |
| 1584                                     | 3.39                  | Fl                    | 1530            | 2.57    | Fl                  | 1530                                      | 2.63    | Fl                  |
| 1555                                     | 3.64                  | Fl                    | 1505            | 2.81    | Fl                  | 1505                                      | 2.8     | Fl                  |
| 1505                                     | 4.75                  | Fl                    | 1482            | 0.85    | Fl                  | 1482                                      | 0.83    | Fl                  |
| 1493                                     | 1.36                  | Fl                    | 1474            | 0.42    | Fl                  | 1474                                      | 0.42    | Fl                  |

<sup>a)</sup> harmonic normal mode frequency, scaled by 0.965 (in cm<sup>-1</sup>)



b) infrared intensity (in Debye/AMU·Å<sup>2</sup>)

c) assignments of the normal models to the C=O and NH<sub>2</sub> vibrations of Asn378 (indicated as "Asn"), C=O<sub>2</sub> and C=O<sub>4</sub> of flavin ("Fl C=O<sub>2</sub>" and "Fl C=O<sub>4</sub>") and C=C and C=N of flavin ("Fl").
